# Supplementary material for: A Systematic Review and Meta-Analysis of Serum Adiponectin Measurements in the Framework of Dog Obesity
Source: Animals (Basel). 2020 Sep 14;10(9):1650. doi: 10.3390/ani10091650 (PMC7552203; doi:10.3390/ani10091650)
Supplement: Supplementary file 1 [file animals-10-01650-s001.xlsx]

## Sheet: Table_S1
Supplementary Material S1 Search strategies for PubMed, Web of Science, Scopus, ProQuest and Biological Abstracts via Ovid
Database	Search Strategies
	((("serum"[MeSH Terms] OR "serum"[All Fields] OR "serums"[All Fields] OR "serum s"[All Fields] OR "serumal"[All Fields] OR ("plasma"[MeSH Terms] OR "plasma"[All Fields] OR "plasmas"[All Fields] OR "plasma s"[All Fields])) AND ("adiponectin"[MeSH Terms] OR "adiponectin"[All Fields] OR "adiponectin s"[All Fields] OR "adiponectine"[All Fields] OR "adiponectins"[All Fields]) AND ("concentrate"[All Fi…
PubMed
Web of Science	TOPIC: (serum adiponectin in canine obesity) OR TOPIC: (plasma adiponectin in canine obesity) OR TOPIC: (serum adiponectin in obese dogs) AND TOPIC: (plasma adiponectin in obese dogs) AND TOPIC: (HMW adiponectin in obese dogs) AND TOPIC: (adiponectin isomers in obese dogs)
Scopus	(TITLE-ABS-KEY ( serum ) OR TITLE-ABS-KEY ( plasma ) AND TITLE-ABS-KEY ( adiponectin ) AND TITLE-ABS-KEY ( levels ) OR TITLE-ABS-KEY ( concentrations ) AND TITLE-ABS-KEY ( obesity ) AND TITLE-ABS-KEY ( dogs ))
ProQuest	noft((serum adiponectin in obese dogs) OR (plasma adiponectin in obese dogs) OR (serum adiponectin in canine obesity) OR (plasma adiponectin in canine obesity) (HMW adiponectin in obese dogs) OR (adiponectin isomers in obese dogs))
Biological Abstracts via Ovid	AF(serum adiponectin in obese dogs) OR AF(plasma adiponectin in obese dogs) OR AF(serum adiponectin in canine obesity) OR AF(plasma adiponectin in canine obesity) OR AF(HMW adiponectin in obese dogs) OR AF(adiponectin isomers in obese dogs))

## Sheet: Table_S2
Supplementary Material S2. Coding data of stduies from search strategy.																						BCS			Group_1				Group_2		mean			Group_1				Group_2		sd			Group_1				Group_2		mean
No	Year	Study	1st author	Cuntry of study	Study design	Sample size	Assay method	Assay validated?	Gender	Breed	Number of groups	Normal/healthy/control group n	Test1 group description	Test1 group n	Test2 group description	Test2 group n	Test3 group description	Test3 group n	Number of sampling per group	Reason for repeated samplings	Scale	Normal/healthy/control group	Test1 group	Test2 group	BCS_T0	BCS_T1	BCS_T2	BCS_T3	BCS_T0	BCS_T1	AdpT_mean_controls	AdpT_mean_T1	AdpT_mean_T2	AdpT_mean_T0	AdpT_mean_T1	AdpT_mean_T2	AdpT_mean_T3	AdpT_mean_T0	AdpT_mean_T1	AdpT_sd_controls	AdpT_sd_T1	AdpT_sd_T2	AdpT_sd_T0	AdpT_sd_T1	AdpT_sd_T2	AdpT_sd_T3	AdpT_sd_T0	AdpT_sd_T1	AdpT_mean_controls
1	2020	Use of Proteases for the Evaluation of the Different Adiponectin Isoforms in the Dog	Muñoz-Prieto A	Spain	Experimental	14	Human Adiponectin ELISA, High Sensitivity Kit, BioVendor-Laboratorni medicina.	Yes	Male	Beagles	1		Obese						2	Weight loss	5				4.7	4								6.982	9.65								1.947	3.257
2	2019	A new highly sensitive immunoassay for the detection of adiponectin in serum and saliva of dogs and its application in obesity and canine leishmaniosis	Muñoz-Prieto A	Spain	Case-control	26	Alphalisa immunoassay	Yes	Male	Beagles	3	11	Overweight	8	Obese	7			1	-	5	3.2	4.1	5							22.74		10.26							8.76	3.88
3	2019	Anti-obesity effects of Korean red ginseng extract in healthy beagles	Bae, S	S. Korea	Experimental	7	ELISA kit (Otsuka, Tokyo, Japan)	Yes	6M/1F	Beagles	1		Obese	6	Lean	6			2	Weight loss	9				6.4	4.7								1.12	1.04								0.08	0.24
4	2017	Cardiac and Metabolic Variables in Obese Dogs	Tropf, M	United States	Case-control	46	ELISA kit (Otsuka, Tokyo, Japan)	Yes	19M/27F	Mixed	2	29	Obese	17					1	-	9	4	8								27.9	22.02								9.77	14.61
5	2016	Serum biochemistry profile, inflammatory cytokines, adipokines and cardiovascular findings in obese dogs	Piantedosi, T	Italy	Case-control	40	Canine Adiponectin ELISA kit; Millipore, St. Charles, Missouri, USA	Yes	10M/30F	Mixed	2	20	Obese	20					1	-	9	5	7.4								2.46	1.21								2.1	0.96
6	2015	Association of Obesity with Serum Leptin, Adiponectin, and Serotonin and Gut Microflora in Beagle Dogs	Park, H.	S. Korea	Experimental	14	Canine Adiponectin ELISA kit; Millipore, St. Charles, Missouri, USA	Yes	-	Beagles	2		Lean	7					2	Weight gain	9				5	8.71							22.4	9.07				22.4	9.07				8.28	7.12			7.87	4.72
7	2014	Leptin, adiponectin and serotonin levels in lean and obese dogs	Park, H.	S. Korea	Case-control	82	Canine Adiponectin ELISA kit; Millipore, St. Charles, Missouri, USA	Yes	32M/50F	Mixed	2	41	Obese	41					1	-	9	4.32	8.09								12.18	6.23								1.09	0.79
8	2014	Short-term obesity results in detrimental metabolic and cardiovascular changes that may not be reversed with weight loss in an obese dog model	Adolphe, J.	Canada	Case-control	8	Canine Adiponectin ELISA kit; Millipore, St. Charles, Missouri, USA	Yes	3M/5F	Beagles	1		Lean dogs						4	Weight gain	9													21.3			10.1						4.5			2.5
9	2012	Effect of weight loss on inflammatory biomarkers in obese dogs	Tvarijonaviciute, A	Spain	Experimental	6	Human Adiponectin ELISA, High Sensitivity Kit, BioVendor-Laboratorni medicina.	Yes	6F	Beagles	1		Obese						3	Weight loss	5				5			3						8.26			6.3						1.9			1.7
10	2011	Distinct adiponectin profiles might contribute to differences in susceptibility to type 2 diabetes in dogs and humans	Verkest	Australia	Case-control	12	ELISA kit (Otsuka, Tokyo, Japan)	Yes	6M/6F	Mixed	2	6	Obese	6					1	-	9	4.5	8.5								25	15								14.55	14.55								21
11	2011	Compensation for obesity-induced insulin resistance in dogs: assessment of the effects of leptin, adiponectin, and glucagon-like peptide-1 using path analysis.	Verkest	Australia	Case-control	104	ELISA kit (Otsuka, Tokyo, Japan)	Yes	45M/59F	Mixed	3	29	Overweight	55	Obese	20			1	-	9	4.5	5-7	8.5							17.76		27.5							17.76		13.92
12	2011	The effects of weight loss on adipokines and markers of inflammation in dogs	Wakshlag	United States	Experimental	50	﻿Luminex-based adipokine assay (MilliplexTM MAP canine adipokine kit, Millipore, St. Charles, MO)	No	-	-	1		Obese	25					2	Weight loss	9				8	5								62.575	98.17								42.28	79.55
13	2011	Adipose tissue transcriptome changes during obesity development in female dogs	Grant	United States	Experimental	9	Canine Adiponectin ELISA kit; Millipore, St. Charles, Missouri, USA	Yes	9F	Beagles	2	4	Lean dogs	5						Weight gain	9	4.2	8.1								41.2	37.8								4.5	4
14	2011	Potential use of cholesterol lipoprotein profile to confirm obesity status in dogs	Nobuko	Japan	Case-control	63	ELISA kit (Otsuka, Tokyo, Japan)	Yes	33M/30H	Mixed	2	34	Obese	29					1		5	3	>4								52	48								22	22.5
15	2010	Validation of 2 commercially available enzyme-linked immunosorbent assays for adiponectin determination in canine serum samples	Tvarijonaviciute, A	Spain	Case-control	30	Human Adiponectin ELISA, High Sensitivity Kit, BioVendor-Laboratorni medicina.	Yes	14M/16F)	Mixed	2	8	Overweight/Obese	22					1		5	3	>3								17.4		7.5							6.14	4.62
							Canine Adiponectin ELISA kit; Millipore, St. Charles, Missouri, USA	Yes	14M/16F	Mixed	2	8	Overweight/Obese	22					1		5	3	>3								17.38		8.78							7.5	4.94
16	2010	Relationship between serum butyrylcholinesterase and obesity in dogs: A preliminary report	Tvarijonaviciute, A	Spain	Case-control	15	Human Adiponectin ELISA, High Sensitivity Kit, BioVendor-Laboratorni medicina.	Yes	8M/7F	Beagles	3	4	Overweight	5	Obese	6			1	-	5	3	4	5							14.3		8.1							1.2		2.3
17	2009	Comparison of Adipokine Concentrations and Markers of Inflammation in Obese Versus Lean Dogs	Eirman	United States	Case-control	76	﻿Luminex-based adipokine assay (MilliplexTM MAP canine adipokine kit, Millipore, St. Charles, MO)	No	38F/38M	Mixed	2	39	Obese	37					1		9	5	8								31.475	18.82								17.72	9.59
18	2007	β3-Adrenoceptor agonist AJ-9677 reduces body fat in obese beagles	Omachi	Japan	Experimental	10	ELISA kit (Otsuka, Tokyo, Japan)	Yes	4M/6F	Beagles	1		Obese	5	Placebo	5			2	Weight loss	5				4-5	-			-	-				32.3	55			33.6	36.6				4.9	6
19	2007	The potential role of leptin and adiponectin in obesity: A comparative review	Gayet	France	Case-control	13	Murine radioimmunoassay (LINCO)	No	13F	Beagles	2	6	Obese	7					1		-				-	-			-	-	52	94								6	12
20	2006	Canine adiponectin: cDNA structure, mRNA expression in adipose tissues and reduced plasma levels in obesity	Ishioka	Japan	Experimental	44	ELISA kit (Otsuka, Tokyo, Japan)	Yes	12M/22F	Beagles	2		Lean	22					2	Weight gain	5				-	-								37.7	20.1								2	2.3
					Case-control	71		Yes	-	Mixed	3	34	Overweight	20	Obese	17			1	-	5	3	4	5							33.4	24	16.8							2.9	2.8	3
[truncated: 13 more columns]

## Sheet: Table_S3
Supplementary Material S3. Excluded articles from database searching.
No	Year	Study	1st author	Cuntry of study	Reason for exclusion
1	2004	Canine adiponectin : measurement of its serum/plasma concentration by ELISA and effects of obesity	Omachi, A	Japan	Article not written in English
2	2007	Serum concentrations of adiponectin and characterization of adiponectin protein complexes in dogs	Brunson, B	Unites States	Absense of obese dogs in the study
3	2012	CB 1 antagonism restores hepatic insulin sensitivity without normalization of adiposity in diet-induced obese dogs	Kim, S	Unites States	Dogs under treatment
4	2012	Adipokine Gene Expression in Dog Adipose Tissues and Dog White Adipocytes Differentiated in Primary Culture	Eisele, I	United Kingdom	Absense of serum/plasma adiponectin measurements
5	2014	Age effects on plasma cholesterol and triglyceride profiles and metabolite concentrations in dogs	Kawasumi	Japan	Absense of obese dogs in the study
6	2015	Increased serum concentrations of adiponectin in canine hypothyroidism	Mazaki-Tovi, M	Israel	Absense of obese dogs in the study
7	2015	The associations between serum adiponectin, leptin, C-reactive protein, insulin, and serum long-chain omega-3 fatty acids in Labrador Retrievers	Streeter, R	Unites States	Insufficient information for analysys
8	2015	The impact of weight loss on circulating cytokines in Beagle dogs	Bastien, B	Unites States	Absense of obese dogs in the study
9	2016	Integration of a physical training program in a weight loss plan for overweight pet dogs	Vitger, A	Denmark	Absense of adiponectin measurements
10	2017	Immunometabolic parameters in overweight dogs during weight loss with or without an exercise program	Vitger, A	Denmark	Absense of obese dogs in the study
